# Supplementary material
Source: publisher figshare collection journal article supplement (https://future-science-group.figshare.com/ndownloader/files/34177521)
Supplement: Supplementary file 1 [file 34177521]

***Supplementary data***

**
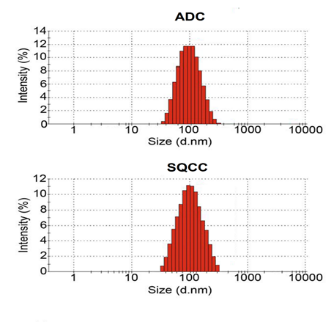
**

**Figure S1.** Size distribution of plasma EVs by nanoparticle tracking analysis.

**Table S1.** The sequences for lncRNAs primers and probes.

| Gene Name | Primer & Probe Sequence | length | Product length |
| --- | --- | --- | --- |
| LUADT1 | F: TTTCCGTTCAGCAAATCCACAC  R: TTAGGTCCAGCACTGTTATCCA  FAM-ATCCTCTTACAGCAAATTTCCA- TAMRA | 22  22  22 | 88 |
| MALAT1 | F: CAGACCACCACAGGTTTACAG  R: AGACCATCCCAAAATGCTTCA  FAM-AGAGCAGTTCTCACGTTGAG - TAMRA | 21  21  20 | 187 |
| NEAT1 | F: GTTTCCAGTAGTATTTCCCTG  R: CACGAACAAGCAGATGAAAGT  FAM-GGCAGAGTTCACAAACACATT- TAMRA | 21  21  21 | 175 |
| MIAT | F: CCATTGTTTTACTTTAACAGACCAGAA  R: GACGCTCCTTTGTTGAATCCAT  FAM- ATTACCCCCAGGGGATACC - TAMRA | 27  22  19 | 137 |
| HPRT1 | F: AGCCTAAGATGAGAGTTC  R: CACAGAACTAGAACATTGATA  FAM- CATCTGGAGTCCTATTGACATCGC -TAMRA | 18  21  24 | 88 |

**Table S2.** The demographic and clinicopathological data of NSCLC samples

| Variable | | Number |
| --- | --- | --- |
| Gender N (%) | Female | 60 (39.2) |
| Male | 93 (60.8) |
| Mean age ± SD | | 58.25 ± 13.07 |
| Subtype N (%) | Adenocarcinoma | 98(64.1) |
| Squamous cell carcinoma | 55 (35.9) |
| Stage N (%) | 1 | 32 (20.9) |
| 2 | 58 (37.9) |
| 3 | 63 (41.2) |
| Body mass index N (%) | <30 | 110 (71.9) |
| >30 | 43 (28.1) |
| Smoking |  | 31 (20.3) |

**Table S3.** Characterization of EV particle diameter

| Sample ADC SQCC | | |
| --- | --- | --- |
| Average of particle diameter (nm) | 118.8 | 122.3 |
| Polydispersity index (PDI)a | 0.218 | 0.224 |
| Major peak of particle diameter (nm) | 153.6 | 166.3 |
| Percentage of 20–200 nm diameter (%) | 78.1 | 78.8 |

ADC adenocarcinoma, SQCC squamous cell carcinoma

a Polydispersity index (PDI) is a dimensionless value that represents the distribution of particle size. PDI values of 0.08–0.7 indicate moderate dispersion system and optimum application scope of algorithm
